# Supplementary material for: Auditory-Motor Expertise Alters “Speech Selectivity” in Professional Musicians and Actors
Source: PubMed Central journal article supplement — Cereb Cortex. 2010 Sep 9;21(4):938–48. doi: 10.1093/cercor/bhq166 (PMC3059891; doi:10.1093/cercor/bhq166), 2010-09-09
Supplement: supp_bhq166_cercor-2010-00248-File006.pdf [file supp_bhq166_cercor-2010-00248-File006.pdf]

| <b>Study</b>                    | <b>Hemi</b> | <b>x</b>   | <b>y</b>   | <b>z</b> | <b>Region</b>   | <b>Contrast</b>                                                                                   |
|---------------------------------|-------------|------------|------------|----------|-----------------|---------------------------------------------------------------------------------------------------|
| <b>Present study</b>            | <b>RH</b>   | <b>50</b>  | <b>-32</b> | <b>2</b> | <b>pSTG/STS</b> |                                                                                                   |
|                                 | <b>RH</b>   | <b>62</b>  | <b>-28</b> | <b>2</b> |                 |                                                                                                   |
| <i>Tervaniemi et al., 2006</i>  |             | 51         | -29        | 6        |                 | <i>Speech - Music</i>                                                                             |
| <i>Belin et al., 2000</i>       |             | 56         | -30        | 6        |                 | <i>"Voice-Sensitive"</i>                                                                          |
| <i>Vouloumanos et al., 2001</i> |             | 56         | -28        | -4       |                 | <i>Speech-Complex Nonspeech</i>                                                                   |
| <i>Heinrich et al., 2008</i>    |             | 58         | -32        | 0        |                 | <i>"Speech-likeness"</i>                                                                          |
|                                 |             | 50         | -34        | 4        |                 | <i>"Speech-likeness"</i>                                                                          |
|                                 |             | 54         | -38        | 4        |                 | <i>Speech Illusion - Illusion Control Stimulus</i>                                                |
| <i>Warren et al., 2006</i>      |             | 50         | -38        | 6        |                 | <i>Correlation with voice salience</i>                                                            |
| <i>Ohnishi et al., 2001</i>     |             | 59         | -25        | 4        |                 | <i>Mixed musicians &gt; Controls when listening to repeated music</i>                             |
| <b>Present study</b>            | <b>LH</b>   | <b>-50</b> | <b>-38</b> | <b>2</b> | <b>pSTG/STS</b> |                                                                                                   |
| <i>Desai et al., 2008</i>       |             | -52        | -34        | 7        |                 | <i>Correlation of phonemic perception with change in activation before/after training</i>         |
| <i>Leech et al., 2009</i>       |             | -54        | -37        | 1        |                 | <i>Correlation of auditory categorization with change in activation before/after training</i>     |
| <i>Möttönen et al., 2006</i>    |             | -61        | -39        | 2        |                 | <i>Correlation of sine-wave speech perception with change in activation before/after training</i> |
| <i>Ohnishi et al., 2001</i>     |             | -57        | -36        | 10       |                 | <i>Mixed musicians &gt; Controls when listening to repeated music</i>                             |
| <i>Margulis et al., 2009</i>    |             | -50        | -37        | 11       |                 | <i>Flautists &amp; violinists showing greater activation for hearing own instrument</i>           |

The coordinates associated with all studies listed in this table and subsequent tables show significant activation in the present study ( $p < .001$  or more) within a 5mm radius of the listed coordinates.

| <b>Study</b>                       | <b>Hemi</b> | <b>x</b> | <b>y</b> | <b>z</b> | <b>Region</b> | <b>Contrast</b>                                                                                                                   |
|------------------------------------|-------------|----------|----------|----------|---------------|-----------------------------------------------------------------------------------------------------------------------------------|
| Present Study                      | LH          | -50      | -44      | 16       | SMG           |                                                                                                                                   |
| <i>Hickok et al., 2003</i>         |             | -51      | -46      | 16       |               | <i>Activated for listening to and covertly rehearsing jabberwocky speech</i>                                                      |
|                                    |             | -54      | -39      | 20       |               | <i>Activated for listening to and covertly rehearsing novel melodies</i>                                                          |
| <i>Hickok et al., 2009</i>         |             | -50      | -40      | 20       |               | <i>Average coordinates over 14 subjects for area 'SPT', (jabberwocky speech &gt; rest) and (rehearse speech &gt; listen only)</i> |
| <i>Vouloumanos et al., 2001</i>    |             | -63      | -42      | 13       |               | <i>Speech - complex nonspeech</i>                                                                                                 |
| <i>Wilson &amp; Iacoboni, 2006</i> |             | -52      | -46      | 14       |               | <i>Negative correlation between producibility and activation</i>                                                                  |
| <i>Graves et al., 2008</i>         |             | -51      | -38      | 22       |               | <i>Repetition suppression in pseudoword repetition as well as effects of word frequency.</i>                                      |
| Present study                      | LH          | -58      | 4        | -4       | Anterior STG  |                                                                                                                                   |
| <i>Scott et al., (2004)</i>        |             | -58      | 0        | 0        |               | <i>Increasing intelligibility</i>                                                                                                 |
| <i>Obleser et al., (2006)</i>      |             | -63      | -2       | -2       |               | <i>Back and Front Vowels &gt; Bandpass Noise</i>                                                                                  |
| <i>Overrath et al., (2008)</i>     |             | -54      | -6       | -2       |               | <i>Increasing spectral correlation</i>                                                                                            |

The coordinates associated with all studies listed in this table and subsequent tables show significant activation in the present study (p <.001 or more) within a 5mm radius of the listed coordinates.
