# Supplementary material for: Auditory-Motor Expertise Alters “Speech Selectivity” in Professional Musicians and Actors
Source: PubMed Central journal article supplement — Cereb Cortex. 2010 Sep 9;21(4):938–48. doi: 10.1093/cercor/bhq166 (PMC3059891; doi:10.1093/cercor/bhq166), 2010-09-09
Supplement: supp_bhq166_cercor-2010-00248-File007.pdf [file supp_bhq166_cercor-2010-00248-File007.pdf]

| <b>Study</b>                     | <b>Hemi</b> | <b>x</b> | <b>y</b> | <b>z</b> | <b>Region</b> | <b>Contrast</b>                                |
|----------------------------------|-------------|----------|----------|----------|---------------|------------------------------------------------|
| Present study                    | LH          | -52      | 0        | 44       | Premotor      |                                                |
|                                  |             | -48      | -8       | 56       |               |                                                |
| <i>Wilson et al., 2004</i>       |             | -51      | -11      | 46       |               | <i>Producing monosyllables</i>                 |
|                                  |             | -50      | -6       | 47       |               | <i>Listening to monosyllables</i>              |
| <i>Chen et al., 2009</i>         |             | -50      | -6       | 52       |               | <i>Anticipating to or tapping with rhythms</i> |
| <i>Calvo-Merino et al., 2005</i> |             | -54      | 0        | 45       |               | <i>Expertise in action observation</i>         |
| <i>Calvo-Merino et al., 2006</i> |             | -48      | 6        | 45       |               | <i>Expertise in action observation</i>         |
| Present study                    | RH          | 58       | -4       | 44       | Premotor      |                                                |
|                                  |             | 50       | -4       | 54       |               |                                                |
| <i>Wilson et al., 2004</i>       |             | 56       | -8       | 44       |               | <i>Producing monosyllables</i>                 |
|                                  |             | 55       | -3       | 45       |               | <i>Listening to monosyllables</i>              |
| <i>Chen et al., 2009</i>         |             | 52       | -6       | 52       |               | <i>Anticipating to or tapping with rhythms</i> |
