# Supplementary material for: Auditory-Motor Expertise Alters “Speech Selectivity” in Professional Musicians and Actors
Source: PubMed Central journal article supplement — Cereb Cortex. 2010 Sep 9;21(4):938–48. doi: 10.1093/cercor/bhq166 (PMC3059891; doi:10.1093/cercor/bhq166), 2010-09-09
Supplement: supp_bhq166_cercor-2010-00248-File008.pdf [file supp_bhq166_cercor-2010-00248-File008.pdf]

### Actors: Violin Music minus Scrambled Violin Music

Activation thresholded at FWE  $p \leq 0.05$ , separate peaks within cluster listed in italics, Z-scores rounded to nearest 0.1, all clusters  $\geq 5$  voxels except where shown in \*

| <b>Region</b>                                           | <b>Hemi</b> | <b>x</b>   | <b>y</b>   | <b>z</b>  | <b>Z-Score</b> | <b>Cluster Size</b> |
|---------------------------------------------------------|-------------|------------|------------|-----------|----------------|---------------------|
| Superior temporal gyrus<br>(STG, posterior to Heschl's) | LH          | -48        | -26        | 6         | Inf            | 2331                |
| <i>STG, anterior to Heschl's</i>                        |             | <i>-50</i> | <i>-10</i> | <i>-2</i> | <i>Inf</i>     |                     |
| <i>STG, lateral</i>                                     |             | <i>-62</i> | <i>-22</i> | <i>4</i>  | <i>Inf</i>     |                     |
| STG, lateral                                            | RH          | 62         | -24        | 8         | Inf            | 2654                |
| <i>STG, posterior to Heschl's</i>                       |             | <i>44</i>  | <i>-30</i> | <i>12</i> | <i>Inf</i>     |                     |
| <i>STG, anterior to Heschl's</i>                        |             | <i>48</i>  | <i>-14</i> | <i>0</i>  | <i>Inf</i>     |                     |
| Dorsal premotor                                         | RH          | 54         | -6         | 52        | 6.3            | 44                  |
| Medial wall (putative SMA)                              | RH          | 4          | 2          | 68        | 6.2            | 28                  |

**Violinists: Violin Music minus Scrambled Violin Music**  
 Statistical thresholds as in previous table

| <b>Region</b>                             | <b>Hemi</b> | <b>x</b> | <b>y</b> | <b>z</b> | <b>Z-Score</b> | <b>Cluster Size</b> |
|-------------------------------------------|-------------|----------|----------|----------|----------------|---------------------|
| STG (planum temporale)                    | LH          | -58      | -38      | 18       | Inf            | 2763                |
| <i>STG (more anterolateral)</i>           |             | -56      | 4        | -2       | <i>Inf</i>     |                     |
| <i>STG (central and medial)</i>           |             | -54      | -10      | 2        | <i>Inf</i>     |                     |
| STG (planum temporale)                    | RH          | 62       | -34      | 16       | Inf            | 3327                |
| STG/STS, posterior                        | RH          | 60       | -26      | 6        | Inf            |                     |
|                                           |             | 52       | -30      | 8        | <i>Inf</i>     |                     |
| Medial wall, putative SMA                 | Midline     | 4        | -2       | 66       | 7.7            | 234                 |
| Dorsal premotor                           | RH          | 52       | -6       | 52       | 7.3            | 237                 |
|                                           |             | 56       | -2       | 46       | 7.1            |                     |
| Dorsal premotor                           | LH          | -48      | -8       | 56       | 6.9            | 81                  |
| Inferior frontal                          | RH          | 62       | 2        | 20       | 6.0            | 27                  |
| Superior cerebellum                       | RH          | 30       | -62      | -24      | 6.0            | 52                  |
| Superior cerebellum                       | RH          | 16       | -70      | -18      | 5.7            | 21                  |
| Anterior medial STG                       | RH          | 38       | 4        | -24      | 5.6            | 21                  |
| Superior cerebellum                       | LH          | -28      | -60      | -24      | 5.6            | 28                  |
| Inferior frontal gyrus,<br>opercular part | RH          | 46       | 16       | 20       | 5.4            | 30                  |
|                                           |             | 40       | 20       | 24       | 5.0            |                     |
| Dorsal premotor                           | LH          | -56      | -4       | 44       | 5.3            | 8                   |
| STS/MTG - middle part                     |             | -64      | -16      | -8       | 5.2            | 7                   |
| Posterior cerebellum                      |             | -8       | -82      | -44      | 5.2            | 14                  |
|                                           |             | -16      | -78      | -42      | 5.0            |                     |
