# Supplementary material for: Auditory-Motor Expertise Alters “Speech Selectivity” in Professional Musicians and Actors
Source: PubMed Central journal article supplement — Cereb Cortex. 2010 Sep 9;21(4):938–48. doi: 10.1093/cercor/bhq166 (PMC3059891; doi:10.1093/cercor/bhq166), 2010-09-09
Supplement: supp_bhq166_cercor-2010-00248-File009.pdf [file supp_bhq166_cercor-2010-00248-File009.pdf]

## List of violin and dramatic works from which excerpts were drawn

### Violin works:

Max Bruch, Violin Concerto #1, First Movement

J.S. Bach, Solo Partita in d minor, Allemande

Lennox Berkeley, Sonatine for Violin

P.I. Tschaikovsky, Violin Concerto, First and Second Movements

G.F. Handel, Sonata # 5 in E for Violin and Keyboard, last two movements

W.A. Mozart, 5th Violin Concerto, First Movement

Robert Schumann, 2nd and 3rd Romances

### Dramatic works:

Anton Chekov, The Seagull, Final Scene, Nina

Richard LaGravenese, Demi-god

William Shakespeare, The Taming of the Shrew, Kate

William Shakespeare, Romeo & Juliet, Balcony scene

Aleksandr Ostrovsky, The Storm, Katerina

Athol Fugard, My Children My Africa, final scene, Isabelle

William Shakespeare, Twelfth Night, Viola monologue

Shakespeare, A Midsummer Night's Dream, Helena

Denise Deegan, Daisy Pulls It Off, opening

Williams, A Streetcar Named Desire, Blanche du Bois entrance

John Marsten, The Dutch Courtesan, Crispinella

William Shakespeare, Henry IV, Pt II, Act 2, Scene 3, Lady Percy
